# Supplementary material
Source: PubMed Central journal article supplement (PMC10134042)
Supplement: jamasurg-e230265-s002.pdf [file jamasurg-e230265-s002.pdf]

## **Data Sharing Statement**

Reeping. Firearm Death Rates in Rural vs Urban US Counties. *JAMA Surg.* Published April 26, 2023. doi:10.1001/jamasurg.2023.0265

### **Data**

**Data available:** No
